# Supplementary material for: Conjugated polyelectrolytes with a label-free aptamer for specific protein photoinactivation
Source: Royal Society of Chemistry journal article supplement (doi:10.1039/c8ay00272j), 2018-01-01
Supplement: c8ay00272j1.pdf [file c8ay00272j1.pdf]

## Electronic Supplementary Material

### Conjugated Polyelectrolytes with Label-free Aptamer for Specific Protein

#### Photoinactivation

Wei Fang,<sup>a,b</sup> Shuwen Liu,<sup>a,b</sup> Chunyan Tan,<sup>a,b\*</sup> Anqi Li,<sup>a,b</sup> Ying Tan,<sup>a,b\*</sup> and Yuyang Jiang<sup>b,c</sup>

<sup>a</sup> Department of Chemistry, Tsinghua University, Beijing 100084, P. R. China;

<sup>b</sup> The Ministry-Province Jointly Constructed Base for State Key Lab-Shenzhen Key Laboratory of Chemical Biology, The Graduate School at Shenzhen, Tsinghua University, Shenzhen 518055, Guangdong, China;

<sup>c</sup> Department of Pharmacology and Pharmaceutical Sciences, School of Medicine, Tsinghua University, Beijing, 100084, P. R. China

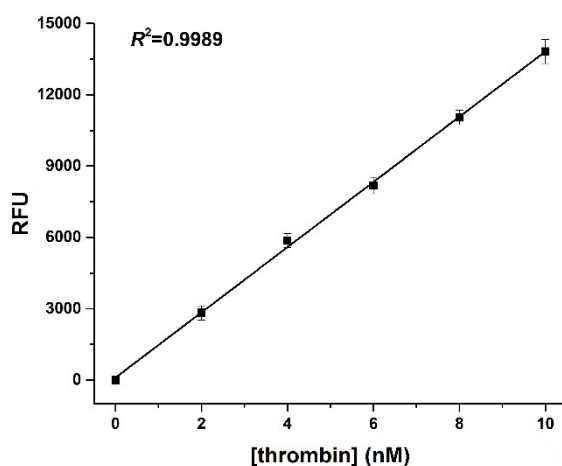

**Fig. S1.** Calibration curve of fluorescence emission wavelength of 440 nm excited at 370 nm against the concentration of thrombin. Error bars are estimated from three

replicate measurements.

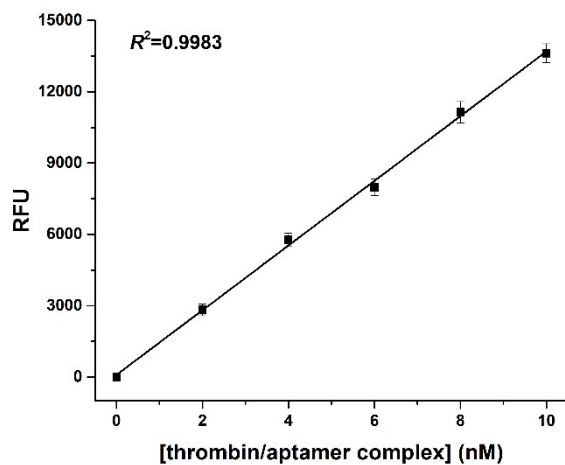

**Fig. S2.** Calibration curve of fluorescence emission wavelength of 440 nm excited at 370 nm against the concentration of thrombin in thrombin/aptamer complex. Error bars are estimated from three replicate measurements.

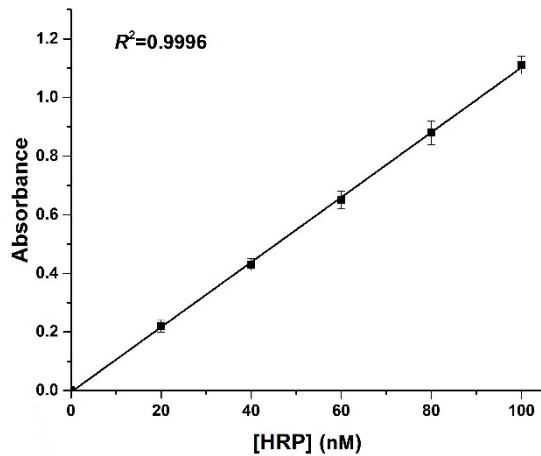

**Fig. S3.** Calibration curve of absorbance at 418 nm against the concentration of HRP. Error bars are estimated from three replicate measurements.
